# Supplementary material
Source: MDPI journal article supplement (https://www.mdpi.com/2078-2489/15/1/66)
Supplement: s1 [file s1]

## Mean FA

### Largest effect size by sex

| Seed                        | Target                    | Connectivity    | Effect Size  | df  |
|-----------------------------|---------------------------|-----------------|--------------|-----|
| wm-lh-medialorbitofrontal   | wm-lh-middletemporal      | Pass-through    | -0.510404461 | 522 |
| ctx-lh-medialorbitofrontal  | wm-lh-middletemporal      | Pass-through    | -0.489322398 | 496 |
| ctx-lh-rostralmiddlefrontal | wm-lh-middletemporal      | Pass-through    | -0.396594776 | 498 |
| ctx-lh-medialorbitofrontal  | wm-lh-insula              | Pass-through    | -0.380086251 | 538 |
| wm-lh-bankssts              | wm-lh-inferiortemporal    | Origin/Terminal | -0.378921068 | 502 |
| ctx-lh-medialorbitofrontal  | ctx-rh-frontalpole        | Origin/Terminal | -0.377164213 | 483 |
| ctx-lh-medialorbitofrontal  | ctx-lh-insula             | Pass-through    | -0.374796717 | 536 |
| Left-Pallidum               | wm-lh-caudalmiddlefrontal | Pass-through    | -0.365712411 | 485 |
| wm-lh-lateraloccipital      | wm-lh-superiorparietal    | Pass-through    | -0.365698044 | 540 |
| Right-Cerebellum-Cortex     | wm-rh-lingual             | Origin/Terminal | 0.361609121  | 533 |
| Left-Putamen                | wm-lh-middletemporal      | Pass-through    | -0.360079159 | 536 |
| ctx-lh-lateraloccipital     | ctx-lh-superiortemporal   | Pass-through    | -0.359731432 | 493 |
| ctx-rh-cuneus               | wm-rh-lateraloccipital    | Pass-through    | -0.359013949 | 540 |
| ctx-rh-superiorfrontal      | wm-lh-insula              | Pass-through    | -0.358117323 | 475 |
| ctx-lh-medialorbitofrontal  | wm-lh-superiortemporal    | Pass-through    | -0.357126656 | 526 |

## Mean ADC

### Largest effect size by sex

| Seed                           | Target                         | Connectivity    | Effect Size | df  |
|--------------------------------|--------------------------------|-----------------|-------------|-----|
| ctx-lh-insula                  | wm-lh-lateraloccipital         | Origin/Terminal | 0.419007    | 461 |
| ctx-lh-medialorbitofrontal     | ctx-lh-insula                  | Pass-through    | 0.414062    | 536 |
| ctx-lh-posteriorcingulate      | wm-lh-rostralanteriorcingulate | Pass-through    | 0.410492    | 490 |
| wm-lh-lateraloccipital         | wm-lh-superiortemporal         | Origin/Terminal | 0.409295    | 526 |
| wm-lh-superiorparietal         | wm-lh-superiortemporal         | Origin/Terminal | 0.398237    | 470 |
| wm-lh-caudalmiddlefrontal      | wm-rh-caudalanteriorcingulate  | Pass-through    | 0.379981    | 510 |
| ctx-lh-middletemporal          | wm-lh-inferiortemporal         | Pass-through    | 0.362646    | 540 |
| ctx-lh-middletemporal          | ctx-lh-temporalpole            | Pass-through    | 0.360192    | 539 |
| ctx-lh-caudalanteriorcingulate | wm-lh-rostralanteriorcingulate | Origin/Terminal | 0.360015    | 514 |
| ctx-lh-lateraloccipital        | ctx-lh-insula                  | Pass-through    | 0.358643    | 517 |
| wm-lh-fusiform                 | wm-lh-superiortemporal         | Origin/Terminal | 0.358269    | 512 |
| ctx-lh-lateraloccipital        | ctx-lh-superiortemporal        | Pass-through    | 0.357273    | 493 |
| ctx-lh-middletemporal          | wm-lh-fusiform                 | Pass-through    | 0.35638     | 539 |
| wm-lh-caudalanteriorcingulate  | wm-lh-caudalmiddlefrontal      | Pass-through    | 0.356376    | 509 |
| wm-rh-bankssts                 | wm-rh-inferiortemporal         | Origin/Terminal | 0.356179    | 468 |
| ctx-lh-caudalanteriorcingulate | ctx-lh-precuneus               | Origin/Terminal | 0.354776    | 463 |

## Number of Tracts

### Largest effect size by sex

| Seed                         | Target                         | Connectivity    | Effect Size | df  |
|------------------------------|--------------------------------|-----------------|-------------|-----|
| Left-Cerebellum-White-Matter | Right-Cerebellum-White-Matter  | Origin/Terminal | 0.508891479 | 539 |
| Left-Cerebellum-White-Matter | ctx-rh-supramarginal           | Origin/Terminal | 0.508775929 | 539 |
| Left-Cerebellum-Cortex       | ctx-lh-precentral              | Pass-through    | 0.508737178 | 538 |
| Left-Cerebellum-Cortex       | Brain-Stem                     | Origin/Terminal | 0.508737178 | 538 |
| Right-Cerebral-White-Matter  | wm-rh-supramarginal            | Origin/Terminal | 0.508397105 | 540 |
| Right-Hippocampus            | ctx-lh-rostralmiddlefrontal    | Pass-through    | 0.508397105 | 540 |
| CSF                          | wm-lh-postcentral              | Origin/Terminal | 0.507291136 | 538 |
| ctx-lh-lingual               | ctx-rh-parsopercularis         | Pass-through    | 0.507144047 | 541 |
| ctx-rh-bankssts              | wm-lh-superiorparietal         | Pass-through    | 0.507144047 | 541 |
| CC_Central                   | ctx-rh-lingual                 | Pass-through    | 0.507144047 | 541 |
| ctx-lh-superiortemporal      | wm-rh-superiorparietal         | Pass-through    | 0.507144047 | 541 |
| ctx-lh-superiorfrontal       | ctx-rh-medialorbitofrontal     | Origin/Terminal | 0.507144047 | 541 |
| ctx-lh-fusiform              | ctx-rh-temporalpole            | Pass-through    | 0.507144047 | 541 |
| Right-Thalamus-Proper        | wm-lh-rostralanteriorcingulate | Origin/Terminal | 0.507144047 | 541 |

## Tracts to Render

### Largest effect size by sex

| Seed                        | Target                     | Connectivity    | Effect Size | df  |
|-----------------------------|----------------------------|-----------------|-------------|-----|
| ctx-lh-superiorfrontal      | wm-lh-superiorfrontal      | Origin/Terminal | 0.673362    | 541 |
| ctx-rh-fusiform             | wm-rh-fusiform             | Origin/Terminal | 0.644881    | 541 |
| ctx-lh-precuneus            | wm-lh-precuneus            | Origin/Terminal | 0.625481    | 541 |
| ctx-lh-superiortemporal     | wm-lh-superiortemporal     | Pass-through    | 0.624466    | 541 |
| ctx-lh-lateraloccipital     | wm-lh-lateraloccipital     | Origin/Terminal | 0.587301    | 541 |
| ctx-lh-parstriangularis     | wm-lh-parstriangularis     | Pass-through    | 0.579324    | 541 |
| ctx-lh-supramarginal        | wm-lh-supramarginal        | Pass-through    | 0.577071    | 541 |
| ctx-rh-fusiform             | ctx-rh-inferiortemporal    | Pass-through    | 0.575552    | 541 |
| ctx-lh-supramarginal        | wm-lh-superiortemporal     | Pass-through    | 0.572275    | 541 |
| ctx-rh-lateraloccipital     | wm-rh-lateraloccipital     | Pass-through    | 0.568799    | 541 |
| ctx-rh-superiorparietal     | wm-rh-superiorparietal     | Pass-through    | 0.567187    | 542 |
| ctx-lh-rostralmiddlefrontal | wm-lh-rostralmiddlefrontal | Pass-through    | 0.562876    | 541 |
| ctx-rh-precuneus            | wm-rh-precuneus            | Pass-through    | 0.554215    | 542 |
| ctx-lh-midtemporal          | wm-lh-midtemporal          | Pass-through    | 0.553279    | 541 |
| ctx-rh-fusiform             | wm-rh-fusiform             | Pass-through    | 0.54742     | 541 |
| ctx-rh-superiorfrontal      | wm-rh-superiorfrontal      | Pass-through    | 0.538995    | 541 |

## Standard Deviation ADC

### Largest effect size by sex

| Seed                        | Target                      | Connectivity    | Effect Size  | df  |
|-----------------------------|-----------------------------|-----------------|--------------|-----|
| ctx-lh-transversetemporal   | ctx-lh-insula               | Origin/Terminal | -0.410886185 | 539 |
| ctx-lh-transversetemporal   | wm-lh-insula                | Origin/Terminal | -0.387978537 | 537 |
| ctx-rh-parsorbitalis        | ctx-rh-parstriangularis     | Origin/Terminal | -0.378045843 | 540 |
| ctx-rh-parstriangularis     | ctx-rh-rostralmiddlefrontal | Origin/Terminal | -0.369305758 | 540 |
| ctx-lh-postcentral          | ctx-lh-transversetemporal   | Origin/Terminal | -0.366394061 | 535 |
| ctx-rh-rostralmiddlefrontal | wm-rh-insula                | Origin/Terminal | -0.356918664 | 505 |
| ctx-lh-postcentral          | ctx-lh-transversetemporal   | Pass-through    | -0.355419823 | 539 |
| ctx-lh-postcentral          | wm-lh-supramarginal         | Origin/Terminal | -0.355010213 | 539 |
| Right-Caudate               | wm-lh-lateralorbitofrontal  | Pass-through    | -0.353646668 | 539 |
| ctx-lh-bankssts             | ctx-lh-middletemporal       | Origin/Terminal | -0.352352149 | 538 |
| wm-lh-lateralorbitofrontal  | wm-rh-lateralorbitofrontal  | Pass-through    | -0.350517033 | 536 |
| ctx-lh-parstriangularis     | wm-lh-parstriangularis      | Origin/Terminal | -0.350274158 | 539 |
| wm-lh-lateralorbitofrontal  | wm-rh-rostralmiddlefrontal  | Pass-through    | -0.34295549  | 529 |
| ctx-lh-superiortemporal     | ctx-lh-supramarginal        | Origin/Terminal | -0.342665436 | 539 |
| ctx-rh-parsorbitalis        | wm-rh-parstriangularis      | Origin/Terminal | -0.3374899   | 524 |

## Standard Deviation FA

### Largest effect size by sex

| Seed                        | Target                     | Connectivity    | Effect Size | df  |
|-----------------------------|----------------------------|-----------------|-------------|-----|
| Left-Pallidum               | ctx-lh-insula              | Pass-through    | -0.5344     | 457 |
| ctx-rh-rostralmiddlefrontal | wm-lh-lateralorbitofrontal | Pass-through    | -0.46974    | 452 |
| wm-rh-inferiorparietal      | wm-rh-lateraloccipital     | Origin/Terminal | -0.45533    | 540 |
| Left-Caudate                | wm-lh-insula               | Origin/Terminal | -0.43558    | 506 |
| wm-lh-fusiform              | wm-lh-lingual              | Origin/Terminal | -0.43548    | 537 |
| ctx-lh-medialorbitofrontal  | ctx-rh-frontalpole         | Origin/Terminal | -0.43493    | 483 |
| ctx-lh-inferiorparietal     | wm-lh-inferiortemporal     | Pass-through    | -0.41015    | 539 |
| wm-rh-lateraloccipital      | wm-rh-superiorparietal     | Pass-through    | -0.40741    | 540 |
| ctx-lh-lateralorbitofrontal | wm-lh-middletemporal       | Pass-through    | -0.40481    | 532 |
| wm-lh-middletemporal        | wm-lh-insula               | Pass-through    | -0.39986    | 540 |
| ctx-rh-inferiorparietal     | wm-rh-lateraloccipital     | Origin/Terminal | -0.39888    | 539 |
| Left-VentralDC              | wm-lh-entorhinal           | Pass-through    | -0.39522    | 538 |
| ctx-lh-lateraloccipital     | wm-rh-superiorparietal     | Pass-through    | -0.39312    | 512 |
| ctx-lh-middletemporal       | wm-lh-bankssts             | Origin/Terminal | -0.39083    | 538 |
| ctx-lh-inferiorparietal     | ctx-lh-inferiortemporal    | Pass-through    | -0.38999    | 536 |
| ctx-rh-lateraloccipital     | wm-rh-inferiorparietal     | Origin/Terminal | -0.3894     | 540 |

## Mean FA – Asymmetry Index

### Largest effect size by sex

| Seed                           | Target                         | Connectivity    | Effect Size  | df  |
|--------------------------------|--------------------------------|-----------------|--------------|-----|
| wm-rh-caudalanteriorcingulate  | wm-rh-rostralanteriorcingulate | Origin/Terminal | 0.30589585   | 526 |
| wm-lh-caudalanteriorcingulate  | wm-lh-rostralanteriorcingulate | Origin/Terminal | -0.299530068 | 526 |
| wm-lh-inferiortemporal         | wm-lh-temporalpole             | Pass-through    | -0.295465783 | 538 |
| wm-rh-inferiortemporal         | wm-rh-temporalpole             | Pass-through    | 0.285637621  | 538 |
| ctx-lh-entorhinal              | wm-lh-inferiortemporal         | Pass-through    | -0.284216821 | 500 |
| Right-Cerebellum-Cortex        | wm-rh-lingual                  | Origin/Terminal | 0.281873903  | 527 |
| wm-lh-posteriorcingulate       | wm-lh-rostralanteriorcingulate | Pass-through    | -0.27326477  | 524 |
| ctx-lh-bankssts                | wm-lh-middletemporal           | Origin/Terminal | 0.271276864  | 532 |
| ctx-rh-temporalpole            | wm-rh-temporalpole             | Pass-through    | 0.267972619  | 538 |
| ctx-rh-lateraloccipital        | ctx-rh-superiortemporal        | Pass-through    | 0.267833703  | 466 |
| wm-lh-superiortemporal         | wm-lh-temporalpole             | Pass-through    | -0.267550762 | 538 |
| ctx-lh-temporalpole            | wm-lh-temporalpole             | Pass-through    | -0.267146655 | 538 |
| ctx-rh-caudalanteriorcingulate | wm-lh-superiorfrontal          | Pass-through    | 0.262364222  | 534 |

## Mean ADC – Asymmetry Index

### Largest effect size by sex

| Seed                          | Target                         | Connectivity    | Effect Size  | df  |
|-------------------------------|--------------------------------|-----------------|--------------|-----|
| wm-lh-caudalanteriorcingulate | wm-lh-rostralanteriorcingulate | Origin/Terminal | 0.344801663  | 526 |
| Left-Cerebellum-Cortex        | wm-lh-superiorfrontal          | Pass-through    | 0.31588575   | 493 |
| wm-rh-caudalanteriorcingulate | wm-rh-rostralanteriorcingulate | Origin/Terminal | -0.309463746 | 526 |
| Right-Cerebellum-Cortex       | wm-rh-superiorfrontal          | Pass-through    | -0.308465622 | 494 |
| ctx-lh-inferiorparietal       | ctx-lh-insula                  | Pass-through    | 0.305337381  | 481 |
| ctx-rh-inferiorparietal       | ctx-rh-insula                  | Pass-through    | -0.295343012 | 481 |
| Right-Cerebral-White-Matter   | ctx-lh-posteriorcingulate      | Pass-through    | 0.282895023  | 494 |
| Right-Cerebral-White-Matter   | wm-lh-cuneus                   | Pass-through    | 0.281851596  | 467 |
| Left-Cerebral-White-Matter    | wm-rh-cuneus                   | Pass-through    | -0.281642196 | 466 |
| ctx-rh-precuneus              | wm-lh-posteriorcingulate       | Origin/Terminal | -0.281485877 | 481 |
| ctx-rh-precentral             | wm-rh-supramarginal            | Origin/Terminal | -0.270571013 | 528 |
| Right-Cerebellum-Cortex       | ctx-rh-superiorfrontal         | Pass-through    | -0.267668023 | 484 |
| Right-Accumbens-area          | wm-rh-rostralanteriorcingulate | Origin/Terminal | -0.26645179  | 506 |
| Left-Cerebellum-Cortex        | ctx-lh-superiorfrontal         | Pass-through    | 0.266000101  | 483 |
| Left-VentralDC                | ctx-lh-parahippocampal         | Pass-through    | 0.265160641  | 455 |
| Left-Cerebral-White-Matter    | ctx-rh-posteriorcingulate      | Pass-through    | -0.264082395 | 494 |

## Number of Tracts – Asymmetry Index

### Largest effect size by sex

| Seed                        | Target                         | Connectivity    | Effect Size  | df  |
|-----------------------------|--------------------------------|-----------------|--------------|-----|
| Right-Cerebral-White-Matter | Right-VentralDC                | Pass-through    | 0.279673634  | 513 |
| Left-Cerebral-White-Matter  | Left-Pallidum                  | Pass-through    | -0.229593396 | 538 |
| Right-Cerebral-White-Matter | Right-Cerebellum-Cortex        | Origin/Terminal | 0.203619897  | 508 |
| Left-Cerebral-White-Matter  | Left-Cerebellum-White-Matter   | Pass-through    | -0.198771344 | 538 |
| Right-Cerebral-White-Matter | ctx-rh-caudalanteriorcingulate | Origin/Terminal | 0.198667112  | 526 |
| Left-Cerebral-White-Matter  | Left-Putamen                   | Pass-through    | -0.197616528 | 538 |
| Left-Cerebral-White-Matter  | Left-VentralDC                 | Pass-through    | -0.194508012 | 537 |
| Left-Cerebral-White-Matter  | Left-Cerebellum-Cortex         | Origin/Terminal | -0.179564247 | 537 |
| Right-Cerebral-White-Matter | Right-Accumbens-area           | Pass-through    | 0.176198293  | 512 |
| Left-Cerebral-White-Matter  | Left-Hippocampus               | Pass-through    | -0.16897932  | 539 |
| Left-Cerebral-White-Matter  | Left-Accumbens-area            | Pass-through    | -0.168913862 | 539 |

## Lines to Render – Asymmetry Index

### Largest effect size by sex

| Seed                        | Target                     | Connectivity    | Effect Size  | df  |
|-----------------------------|----------------------------|-----------------|--------------|-----|
| ctx-lh-lateraloccipital     | ctx-lh-middletemporal      | Pass-through    | 0.313491537  | 540 |
| wm-rh-superiorfrontal       | wm-rh-superiortemporal     | Pass-through    | 0.310302643  | 489 |
| wm-rh-rostralmiddlefrontal  | wm-rh-superiorparietal     | Pass-through    | 0.306172862  | 533 |
| ctx-rh-parsorbitalis        | ctx-rh-parstriangularis    | Pass-through    | -0.287230139 | 540 |
| ctx-lh-middletemporal       | wm-lh-lateraloccipital     | Pass-through    | 0.283641959  | 540 |
| ctx-lh-bankssts             | ctx-lh-superiortemporal    | Origin/Terminal | 0.276571236  | 541 |
| ctx-rh-superiortemporal     | wm-rh-precentral           | Pass-through    | 0.271911359  | 539 |
| ctx-lh-lateralorbitofrontal | ctx-lh-middletemporal      | Pass-through    | 0.270917201  | 497 |
| ctx-lh-precentral           | wm-lh-parstriangularis     | Pass-through    | 0.269941514  | 526 |
| ctx-rh-lateralorbitofrontal | wm-rh-rostralmiddlefrontal | Origin/Terminal | 0.269275461  | 461 |
| Right-Accumbens-area        | Right-VentralDC            | Pass-through    | 0.266105907  | 538 |
| Left-Pallidum               | wm-lh-precentral           | Pass-through    | 0.262424115  | 540 |

## Tracts to Render – Asymmetry Index

### Largest effect size by sex

| Seed                       | Target                     | Connectivity    | Effect Size | df  |
|----------------------------|----------------------------|-----------------|-------------|-----|
| Right-Caudate              | wm-rh-lateralorbitofrontal | Pass-through    | 0.326892033 | 540 |
| ctx-lh-bankssts            | ctx-lh-superiortemporal    | Origin/Terminal | 0.323394018 | 541 |
| wm-rh-rostralmiddlefrontal | wm-rh-superiorparietal     | Pass-through    | 0.304050826 | 533 |
| ctx-lh-lateraloccipital    | ctx-lh-middletemporal      | Pass-through    | 0.2974253   | 540 |
| wm-rh-superiorfrontal      | wm-rh-superiortemporal     | Pass-through    | 0.293029546 | 489 |

|                             |                            |                 |             |     |
|-----------------------------|----------------------------|-----------------|-------------|-----|
| ctx-lh-rostralmiddlefrontal | wm-rh-lateralorbitofrontal | Pass-through    | 0.291462302 | 452 |
| ctx-rh-lateralorbitofrontal | wm-rh-rostralmiddlefrontal | Origin/Terminal | 0.284597775 | 461 |
| ctx-lh-inferiorparietal     | wm-lh-transversetemporal   | Pass-through    | 0.282486003 | 503 |
| ctx-lh-middletemporal       | wm-lh-lateraloccipital     | Pass-through    | 0.281989463 | 540 |
| ctx-rh-entorhinal           | ctx-rh-parahippocampal     | Pass-through    | 0.274146482 | 539 |
| ctx-lh-precentral           | wm-lh-parstriangularis     | Pass-through    | 0.273650951 | 526 |
| ctx-lh-precuneus            | wm-lh-lingual              | Pass-through    | 0.27302815  | 540 |
| wm-lh-postcentral           | wm-lh-precentral           | Origin/Terminal | 0.270888612 | 540 |
| ctx-lh-lingual              | ctx-lh-precuneus           | Pass-through    | 0.2704043   | 540 |

## Standard Deviation ADC – Asymmetry Index

### Largest effect size by sex

| Seed                        | Target                    | Connectivity    | Effect Size | df  |
|-----------------------------|---------------------------|-----------------|-------------|-----|
| Right-Cerebellum-Cortex     | ctx-rh-fusiform           | Origin/Terminal | 0.339637715 | 538 |
| ctx-rh-parsopercularis      | wm-rh-postcentral         | Pass-through    | 0.32519696  | 524 |
| Left-Cerebellum-Cortex      | ctx-lh-fusiform           | Origin/Terminal | -0.31852148 | 537 |
| ctx-rh-fusiform             | ctx-rh-lingual            | Origin/Terminal | 0.307432253 | 538 |
| ctx-rh-pericalcarine        | wm-lh-cuneus              | Pass-through    | 0.302989089 | 477 |
| Right-Caudate               | Right-VentralDC           | Pass-through    | -0.28922096 | 536 |
| Right-Cerebral-White-Matter | Right-Pallidum            | Pass-through    | 0.288531031 | 499 |
| ctx-lh-parsopercularis      | wm-lh-postcentral         | Pass-through    | -0.28086546 | 524 |
| Left-Cerebral-White-Matter  | wm-rh-pericalcarine       | Pass-through    | -0.27957392 | 473 |
| Left-VentralDC              | wm-lh-medialorbitofrontal | Pass-through    | -0.27896243 | 526 |
| ctx-lh-superiorparietal     | wm-rh-lingual             | Pass-through    | 0.277247319 | 489 |
| Left-Cerebellum-Cortex      | wm-lh-fusiform            | Origin/Terminal | -0.27635627 | 535 |
| Left-Caudate                | Left-VentralDC            | Pass-through    | 0.273523515 | 535 |
| ctx-rh-precentral           | wm-rh-supramarginal       | Origin/Terminal | -0.27002970 | 528 |

## Standard Deviation FA – Asymmetry Index

### Largest effect size by sex

| Seed                    | Target                 | Connectivity | Effect Size  | df  |
|-------------------------|------------------------|--------------|--------------|-----|
| ctx-lh-inferiorparietal | wm-lh-precentral       | Pass-through | 1.080233447  | 496 |
| ctx-lh-precentral       | wm-lh-inferiorparietal | Pass-through | 0.909896885  | 530 |
| ctx-rh-inferiorparietal | wm-rh-precentral       | Pass-through | -0.879608229 | 496 |
| wm-lh-inferiorparietal  | wm-lh-precentral       | Pass-through | 0.850937118  | 538 |
| ctx-rh-inferiortemporal | wm-rh-bankssts         | Pass-through | 0.83131755   | 533 |
| ctx-rh-precentral       | wm-rh-inferiorparietal | Pass-through | -0.829078014 | 530 |
| wm-rh-inferiortemporal  | wm-rh-supramarginal    | Pass-through | 0.825370366  | 530 |
| ctx-rh-superiorparietal | wm-rh-supramarginal    | Pass-through | 0.796100677  | 539 |
| ctx-lh-inferiorparietal | ctx-lh-postcentral     | Pass-through | 0.786141863  | 501 |
| wm-rh-bankssts          | wm-rh-inferiortemporal | Pass-through | 0.774215731  | 539 |

|                        |                          |                 |              |     |
|------------------------|--------------------------|-----------------|--------------|-----|
| wm-rh-inferiorparietal | wm-rh-precentral         | Pass-through    | -0.770096342 | 538 |
| Right-Putamen          | Right-Pallidum           | Pass-through    | 0.754891546  | 540 |
| Right-Putamen          | wm-rh-transversetemporal | Pass-through    | 0.750972164  | 472 |
| wm-lh-inferiortemporal | wm-lh-supramarginal      | Pass-through    | -0.749793436 | 530 |
| wm-rh-midletemporal    | wm-rh-postcentral        | Pass-through    | 0.722347998  | 474 |
| Right-Pallidum         | wm-rh-precentral         | Origin/Terminal | 0.720020737  | 474 |
