# Supplementary material
Source: MDPI journal article supplement (https://www.mdpi.com/2078-2489/15/1/66)
Supplement: s1 [file s1]

# Supplement SB

Effect size of the Asymmetry Index of STD FA

| ROI Start                                      | ROI End                                        | Effect Size | df  |
|------------------------------------------------|------------------------------------------------|-------------|-----|
| inferior parietal grey matter                  | precentral white matter                        | 1.0802      | 496 |
| precentral grey matter                         | inferior parietal white matter                 | 0.9099      | 530 |
| inferior parietal white matter                 | precentral white matter                        | 0.8509      | 538 |
| inferior temporal grey matter                  | banks of superior temporal sulcus white matter | 0.8313      | 533 |
| inferior temporal white matter                 | supramarginal white matter                     | 0.8254      | 530 |
| superior parietal grey matter                  | supramarginal white matter                     | 0.7961      | 539 |
| inferior parietal grey matter                  | postcentral grey matter                        | 0.7861      | 501 |
| banks of superior temporal sulcus white matter | inferior temporal white matter                 | 0.7742      | 539 |
| putamen                                        | pallidum                                       | 0.7549      | 540 |
| putamen                                        | transverse temporal white matter               | 0.7510      | 472 |
| middle temporal white matter                   | postcentral white matter                       | 0.7223      | 474 |
| pallidum                                       | precentral white matter                        | 0.7200      | 474 |
| caudal middle frontal white matter             | pars triangularis white matter                 | 0.7137      | 501 |
| banks of superior temporal sulcus white matter | precentral white matter                        | 0.7065      | 498 |
| supramarginal grey matter                      | superior temporal white matter                 | 0.6865      | 538 |
| precentral grey matter                         | pars triangularis white matter                 | 0.6615      | 496 |
| inferior parietal grey matter                  | postcentral white matter                       | 0.6594      | 519 |
| medial orbitofrontal grey matter               | medial orbitofrontal white matter              | 0.6588      | 538 |
| caudal anterior cingulate white matter         | precuneus white matter                         | 0.6325      | 526 |
| pallidum                                       | rostral middle frontal white matter            | 0.6297      | 491 |
| precentral grey matter                         | rostral middle frontal grey matter             | 0.6165      | 514 |
| precentral grey matter                         | rostral middle frontal white matter            | 0.5910      | 534 |
| isthmus cingulate grey matter                  | posterior cingulate white matter               | 0.5894      | 538 |
| superior frontal grey matter                   | caudal middle frontal white matter             | 0.5881      | 462 |
| insula grey matter                             | lateral occipital white matter                 | 0.5824      | 525 |
| putamen                                        | insula white matter                            | 0.5776      | 538 |
| banks of superior temporal sulcus white matter | middle temporal white matter                   | 0.5724      | 539 |
| pars triangularis white matter                 | supramarginal white matter                     | 0.5692      | 518 |
| superior temporal grey matter                  | pars opercularis white matter                  | 0.5616      | 532 |
| pars opercularis grey matter                   | superior temporal grey matter                  | 0.5598      | 534 |
| pars opercularis white matter                  | postcentral white matter                       | 0.5552      | 530 |
| banks of superior temporal sulcus white matter | postcentral white matter                       | 0.5536      | 501 |

|                                                |                                                |        |     |
|------------------------------------------------|------------------------------------------------|--------|-----|
| superior parietal grey matter                  | superior parietal white matter                 | 0.5452 | 540 |
| pars triangularis white matter                 | precentral white matter                        | 0.5401 | 529 |
| inferior temporal grey matter                  | supramarginal white matter                     | 0.5377 | 497 |
| meidal orbitofrontal white matter              | temporal pole white matter                     | 0.5337 | 512 |
| banks of superior temporal sulcus white matter | insula white matter                            | 0.5332 | 536 |
| insula grey matter                             | banks of superior temporal sulcus white matter | 0.5315 | 519 |
| middle temporal grey matter                    | precentral white matter                        | 0.5305 | 464 |
| pallidum                                       | superior temporal white matter                 | 0.5280 | 514 |
| pallidum                                       | lateral orbitofrontal white matter             | 0.5254 | 539 |
| superior temporal grey matter                  | supramarginal grey matter                      | 0.5227 | 538 |
| insula grey matter                             | inferior parietal white matter                 | 0.5211 | 536 |
| superior temporal white matter                 | transverse temporal white matter               | 0.5193 | 539 |
| putamen                                        | superior temporal grey matter                  | 0.5183 | 536 |
| paracentral grey matter                        | precentral white matter                        | 0.5137 | 538 |
| caudal middle frontal white matter             | inferior parietal white matter                 | 0.5135 | 459 |
| inferior temporal grey matter                  | insula grey matter                             | 0.5126 | 477 |
| precentral white matter                        | supramarginal white matter                     | 0.5087 | 539 |
| pallidum                                       | rostral middle frontal white matter            | 0.5074 | 538 |
| caudal anterior cingulate white matter         | isthmus cingulate white matter                 | 0.5049 | 522 |

ROI, Region of Interest; df, degrees of freedom
