# Supplementary material
Source: MDPI journal article supplement (https://www.mdpi.com/2078-2489/15/1/66)
Supplement: s1 [file s1]

# Supplement SA

Age correlation to tract measurements captured between regions. Only those tracts detected in at least 80% of the subject population were considered.

| Start ROI                                | End ROI                                   | Measurement | Pearson Coefficient* | df  |
|------------------------------------------|-------------------------------------------|-------------|----------------------|-----|
| brain stem                               | left insula white matter                  | meanFA      | 0.670423548          | 533 |
| left precentral grey matter              | left precentral white matter              | stddevFA    | 0.668884386          | 535 |
| right precentral grey matter             | right precentral white matter             | stddevFA    | 0.664163769          | 540 |
| brain stem                               | left superior frontal grey matter         | meanFA      | 0.655857093          | 538 |
| brain stem                               | left superior frontal white matter        | meanFA      | 0.654335889          | 539 |
| brain stem                               | left ventral diencephalon                 | meanFA      | 0.653027369          | 540 |
| left ventral diencephalon                | left insula white matter                  | meanFA      | 0.652088134          | 540 |
| brain stem                               | left precentral white matter              | meanFA      | 0.651719594          | 540 |
| left ventral diencephalon                | left precentral white matter              | meanFA      | 0.651450688          | 540 |
| brain stem                               | right pallidum                            | meanFA      | 0.649856364          | 540 |
| left rostral middle frontal grey matter  | left rostral middle frontal white matter  | stddevFA    | 0.647902868          | 539 |
| left thalamus proper                     | brain stem                                | meanFA      | 0.645711539          | 538 |
| left postcentral grey matter             | left postcentral white matter             | stddevFA    | 0.644327263          | 540 |
| right putamen                            | right insula white matter                 | meanFA      | 0.643973341          | 541 |
| right putamen                            | right pallidum                            | meanFA      | 0.64363285           | 541 |
| left caudal middle frontal grey matter   | left precentral grey matter               | stddevFA    | 0.64279635           | 539 |
| right postcentral grey matter            | right postcentral white matter            | stddevFA    | 0.639480964          | 540 |
| left pars opercularis grey matter        | left pars opercularis white matter        | stddevFA    | 0.638633399          | 540 |
| brain stem                               | right ventral diencephalon                | meanFA      | 0.638076686          | 540 |
| left thalamus proper                     | left ventral diencephalon                 | meanFA      | 0.63645101           | 538 |
| right pallidum                           | right insula white matter                 | meanFA      | 0.633651734          | 541 |
| brain stem                               | right insula white matter                 | meanFA      | 0.633155954          | 540 |
| right pallidum                           | right ventral diencephalon                | meanFA      | 0.632460591          | 541 |
| right rostral middle frontal grey matter | right rostral middle frontal white matter | stddevFA    | 0.632028345          | 540 |
| left ventral diencephalon                | left superior frontal grey matter         | meanFA      | 0.630452243          | 539 |
| left ventral diencephalon                | left precentral grey matter               | meanFA      | 0.630434096          | 539 |
| left caudal middle frontal grey matter   | left precentral white matter              | stddevFA    | 0.630424903          | 539 |
| left ventral diencephalon                | left superior frontal white matter        | meanFA      | 0.628132067          | 540 |
| right supramarginal grey matter          | right supramarginal white matter          | stddevFA    | 0.625935208          | 540 |
| left thalamus proper                     | left insula white matter                  | meanFA      | 0.624773751          | 538 |
| left superior temporal grey matter       | left supramarginal white matter           | stddevFA    | 0.62455858           | 539 |
| brain stem                               | left precentral grey matter               | meanFA      | 0.624034428          | 540 |
| brain stem                               | right superior frontal white matter       | meanFA      | 0.623359821          | 540 |
| brain stem                               | right putamen                             | meanFA      | 0.62220441           | 540 |

|                                          |                                          |          |             |     |
|------------------------------------------|------------------------------------------|----------|-------------|-----|
| right putamen                            | right lateral orbitofrontal white matter | meanFA   | 0.620776887 | 541 |
| left supramarginal grey matter           | left postcentral white matter            | stddevFA | 0.619061188 | 539 |
| left thalamus proper                     | left precentral white matter             | meanFA   | 0.618756442 | 538 |
| left pars opercularis grey matter        | left rostral middle frontal white matter | stddevFA | 0.618046719 | 539 |
| left insula grey matter                  | left insula white matter                 | stddevFA | 0.617651655 | 540 |
| left rostral middle frontal white matter | left insula white matter                 | meanFA   | 0.617612639 | 540 |
| brain stem                               | right thalamus proper                    | meanFA   | 0.617361797 | 540 |
| right supramarginal grey matter          | right postcentral white matter           | stddevFA | 0.616969449 | 540 |
| brain stem                               | right precentral white matter            | meanFA   | 0.616306705 | 540 |
| left superior frontal grey matter        | left superior frontal white matter       | stddevFA | 0.616196499 | 540 |
| brain stem                               | right superior frontal grey matter       | meanFA   | 0.615624121 | 539 |
| right postcentral white matter           | right supramarginal white matter         | stddevFA | 0.615326691 | 540 |
| right putamen                            | right ventral diencephalon               | meanFA   | 0.615223476 | 541 |
| right postcentral white matter           | right precentral white matter            | stddevFA | 0.615182868 | 540 |
| right lateral orbitofrontal white matter | right insula white matter                | meanFA   | 0.614745235 | 540 |
| right ventral diencephalon               | right precentral white matter            | meanFA   | 0.614730772 | 541 |
| left precentral grey matter              | left precentral white matter             | stddevFA | 0.613734927 | 539 |
| brain stem                               | right pars triangularis white matter     | meanFA   | 0.613240244 | 525 |
| left supramarginal grey matter           | left supramarginal white matter          | stddevFA | 0.613100619 | 539 |
| left pars opercularis grey matter        | left precentral grey matter              | stddevFA | 0.612398617 | 539 |
| right thalamus proper                    | right precentral white matter            | meanFA   | 0.611652056 | 541 |
| right inferior parietal white matter     | right supramarginal white matter         | stddevFA | 0.610817171 | 540 |
| left caudal middle frontal grey matter   | left caudal middle frontal white matter  | stddevFA | 0.609591628 | 539 |
| brain stem                               | left pars triangularis white matter      | meanFA   | 0.609518652 | 529 |
| left putamen                             | left insula white matter                 | meanFA   | 0.608052102 | 540 |
| left pars opercularis grey matter        | left precentral white matter             | stddevFA | 0.607514189 | 539 |
| right inferior parietal grey matter      | right supramarginal white matter         | stddevFA | 0.607226171 | 540 |
| left middle temporal grey matter         | left middle temporal white matter        | stddevFA | 0.606667655 | 540 |
| left superior temporal grey matter       | left insula white matter                 | stddevFA | 0.606357015 | 539 |
| right ventral diencephalon               | right insula white matter                | meanFA   | 0.606269383 | 541 |
| left pars triangularis white matter      | left insula white matter                 | meanFA   | 0.606190013 | 539 |
| right ventral diencephalon               | right precentral grey matter             | meanFA   | 0.605257879 | 541 |
| brain stem                               | left caudal middle frontal white matter  | meanFA   | 0.605234581 | 531 |
| left pars opercularis grey matter        | left caudal middle frontal white matter  | stddevFA | 0.604770775 | 540 |
| right ventral diencephalon               | left superior frontal white matter       | meanFA   | 0.60468003  | 528 |
| left pallidum                            | brain stem                               | meanFA   | 0.603889944 | 539 |
| right inferior parietal grey matter      | right inferior parietal white matter     | stddevFA | 0.603883513 | 540 |
| left hippocampus                         | left ventral diencephalon                | stddevFA | 0.603840292 | 539 |
| right thalamus proper                    | right ventral diencephalon               | meanFA   | 0.603687883 | 541 |
| right superior frontal grey matter       | right superior frontal white matter      | stddevFA | 0.603592785 | 540 |
| right superior temporal grey matter      | right supramarginal grey matter          | stddevFA | 0.602264732 | 540 |

|                                           |                                                     |           |             |     |
|-------------------------------------------|-----------------------------------------------------|-----------|-------------|-----|
| left caudal middle frontal grey matter    | left caudal middle frontal white matter             | stddevFA  | 0.601058093 | 539 |
| right insula grey matter                  | right insula white matter                           | stddevFA  | 0.600757491 | 540 |
| brain stem                                | left rostral middle frontal white matter            | meanFA    | 0.600227352 | 536 |
| left pars triangularis white matter       | left insula white matter                            | stddevFA  | 0.599955506 | 539 |
| right rostral middle frontal white matter | right insula white matter                           | meanFA    | 0.599869253 | 540 |
| right superior parietal grey matter       | right superior parietal white matter                | stddevADC | 0.59973895  | 540 |
| right ventral diencephalon                | left superior frontal grey matter                   | meanFA    | 0.599656326 | 519 |
| left pallidum                             | left insula white matter                            | meanFA    | 0.599161399 | 539 |
| right paracentral white matter            | right precentral white matter                       | meanFA    | 0.599095285 | 539 |
| left lateral orbitofrontal white matter   | left insula white matter                            | meanFA    | 0.598891382 | 540 |
| left postcentral white matter             | left precentral white matter                        | stddevFA  | 0.59863674  | 539 |
| right supramarginal grey matter           | right inferior parietal white matter                | stddevFA  | 0.598253533 | 540 |
| left pars opercularis grey matter         | left insula white matter                            | stddevFA  | 0.598251044 | 540 |
| left superior temporal grey matter        | left superior temporal white matter                 | stddevFA  | 0.598090652 | 539 |
| brain stem                                | right precentral grey matter                        | meanFA    | 0.595872434 | 540 |
| right precentral grey matter              | right postcentral white matter                      | stddevFA  | 0.595583831 | 540 |
| left posterior cingulate white matter     | left precentral white matter                        | meanFA    | 0.593796063 | 539 |
| left pars triangularis white matter       | left rostral middle frontal white matter            | stddevFA  | 0.593526726 | 539 |
| right lateral orbitofrontal grey matter   | right lateral orbitofrontal white matter            | stddevFA  | 0.59302613  | 540 |
| right precentral grey matter              | right precentral white matter                       | stddevFA  | 0.592589503 | 540 |
| right precentral grey matter              | right caudal middle frontal white matter            | stddevFA  | 0.5920826   | 540 |
| left caudal middle frontal white matter   | left pars opercularis white matter                  | stddevFA  | 0.591621978 | 539 |
| left middle temporal grey matter          | left banks of superior temporal sulcus white matter | stddevFA  | 0.590606768 | 540 |
| left pallidum                             | left ventral diencephalon                           | meanFA    | 0.590002318 | 539 |
| left postcentral grey matter              | left precentral white matter                        | stddevFA  | 0.589773243 | 540 |
| right thalamus proper                     | right precentral grey matter                        | meanFA    | 0.589631323 | 540 |
| left inferior parietal grey matter        | left inferior parietal white matter                 | stddevFA  | 0.589454719 | 540 |
| left precentral grey matter               | left pars opercularis white matter                  | stddevFA  | 0.588599451 | 539 |
| left pars triangularis grey matter        | left pars triangularis white matter                 | stddevFA  | 0.588371974 | 540 |
| left thalamus proper                      | left precentral grey matter                         | meanFA    | 0.588104778 | 538 |
| left pars opercularis white matter        | left precentral white matter                        | stddevFA  | 0.588024457 | 538 |
| brain stem                                | right rostral middle frontal white matter           | meanFA    | 0.587875652 | 540 |
| right ventral diencephalon                | right superior frontal white matter                 | meanFA    | 0.587500902 | 541 |
| left caudal middle frontal grey matter    | left pars opercularis white matter                  | stddevFA  | 0.586617098 | 539 |
| brain stem                                | left lateral orbitofrontal white matter             | meanFA    | 0.58638332  | 529 |
| left insula grey matter                   | left superior temporal white matter                 | stddevFA  | 0.586207342 | 540 |
| right precentral grey matter              | right precentral white matter                       | meanFA    | 0.58572363  | 540 |
| left lateral orbitofrontal white matter   | left insula white matter                            | stddevFA  | 0.585268741 | 540 |
| left caudal middle frontal grey matter    | left rostral middle frontal grey matter             | stddevFA  | 0.585095421 | 539 |
| brain stem                                | left ventral diencephalon                           | stddevFA  | 0.584734799 | 540 |
| left precentral white matter              | left insula white matter                            | meanFA    | 0.583974979 | 539 |

|                                                     |                                                     |           |             |     |
|-----------------------------------------------------|-----------------------------------------------------|-----------|-------------|-----|
| left middle temporal grey matter                    | left inferior parietal white matter                 | stddevFA  | 0.583890104 | 540 |
| right lateral orbitofrontal grey matter             | right insula white matter                           | meanFA    | 0.583799959 | 540 |
| right ventral diencephalon                          | right pars triangularis white matter                | meanFA    | 0.583586359 | 531 |
| right inferior parietal grey matter                 | right inferior parietal white matter                | stddevADC | 0.582778947 | 540 |
| left precentral grey matter                         | left precentral white matter                        | meanFA    | 0.582208897 | 541 |
| left precentral grey matter                         | left caudal middle frontal white matter             | stddevFA  | 0.582167579 | 540 |
| right lateral orbitofrontal white matter            | right rostral middle frontal white matter           | stddevFA  | 0.582158155 | 540 |
| right postcentral grey matter                       | right precentral white matter                       | stddevFA  | 0.581903406 | 540 |
| right pars opercularis grey matter                  | right precentral white matter                       | stddevFA  | 0.581903393 | 540 |
| right middle temporal grey matter                   | right inferior parietal white matter                | stddevFA  | 0.58145295  | 540 |
| left pars opercularis white matter                  | left rostral middle frontal white matter            | stddevFA  | 0.580964883 | 538 |
| right inferior parietal grey matter                 | right lateral occipital grey matter                 | stddevADC | 0.580796153 | 540 |
| left caudal middle frontal grey matter              | left rostral middle frontal white matter            | stddevFA  | 0.580317869 | 539 |
| left inferior parietal white matter                 | left supramarginal white matter                     | stddevFA  | 0.580098556 | 539 |
| left caudal middle frontal grey matter              | left pars opercularis grey matter                   | stddevFA  | 0.579915719 | 539 |
| left banks of superior temporal sulcus white matter | left suprior temporal white matter                  | stddevFA  | 0.579780554 | 539 |
| left putamen                                        | left pallidum                                       | meanFA    | 0.579522145 | 539 |
| brain stem                                          | left postcentral grey matter                        | meanFA    | 0.579444252 | 535 |
| left ventral diencephalon                           | left postcentral grey matter                        | meanFA    | 0.578891008 | 534 |
| left superior temporal grey matter                  | left banks of superior temporal sulcus white matter | stddevFA  | 0.578603374 | 539 |
| left putamen                                        | brain stem                                          | meanFA    | 0.578588319 | 539 |
| brain stem                                          | right caudal middle frontal white matter            | meanFA    | 0.57824854  | 531 |
| right putamen                                       | right insula white matter                           | stddevFA  | 0.578030209 | 541 |

FA, Fractional Anisotropy; ADC, Apparent Diffusion Coefficient; stddev, Standard Deviation; ROI, Region of Interest; df, degrees of freedom

\*p-value < 0.001
